# Supplementary material
Source: PubMed Central journal article supplement (PMC9338439)
Supplement: NIHMS1815073-supplement-2.pdf [file NIHMS1815073-supplement-2.pdf]

A

Recessive model (based on 2 copies of APOL1 risk variants) --age-gender-gfr-10PCs

| Clinical Phenotype/diagnosis                                  | Cases | Controls | Odds Ratio (95% CI) | p-value |
|---------------------------------------------------------------|-------|----------|---------------------|---------|
| Infection/inflammation of internal prosthetic device or graft | 371   | 52431    | 1.38 (1.06-1.80)    | 0.02    |
| Septicemia                                                    | 800   | 46455    | 1.19 (0.98-1.44)    | 0.08    |
| Sepsis and SIRS                                               | 320   | 53247    | 1.45 (1.08-1.93)    | 0.01    |
| Sepsis                                                        | 274   | 53247    | 1.37 (1.10-1.88)    | 0.05    |

B

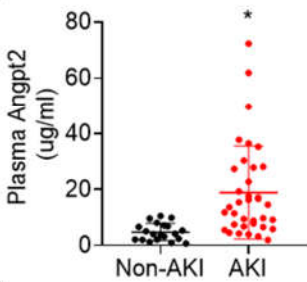

C

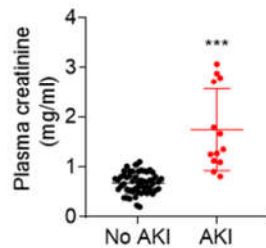

D

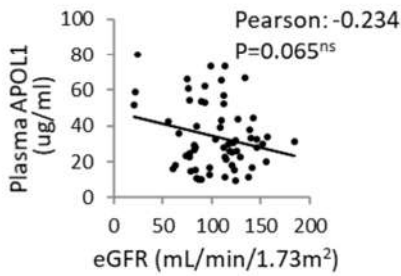

E

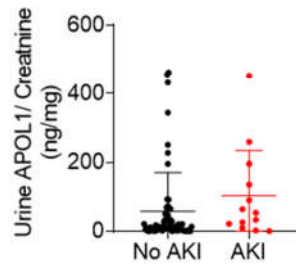

F

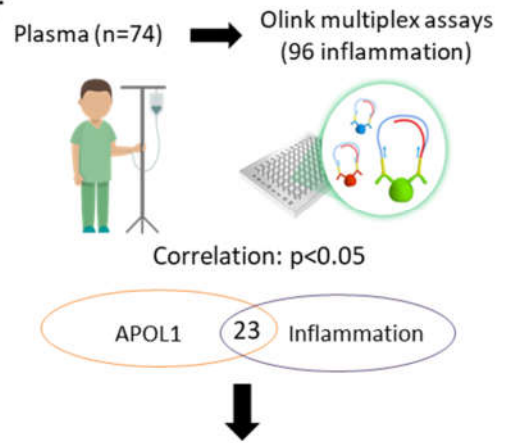

| Name          | P value | Name                   | P value | Name                   | P value | Name              | P value | Name    | P value |
|---------------|---------|------------------------|---------|------------------------|---------|-------------------|---------|---------|---------|
| IL-8          | 0.088   | <b>CXCL9</b>           | 0.01    | TWEAK                  | 0.293   | CD70              | 0.768   | LAMP3   | 0.158   |
| TNFRSF9       | 0.11    | <b>CD8A</b>            | 0.037   | <b>PDGF.su bunit.B</b> | 0.002   | IL10              | 0.413   | CASP.8  | 0.453   |
| TIE2          | 0.856   | <b>CAIX</b>            | 0.046   | PDCD1                  | 0.131   | <b>TFNRSF 12A</b> | 0.012   | ICOSLG  | 0.128   |
| <b>MCP.3</b>  | 0.001   | <b>MUC.16</b>          | 0.019   | FASLG                  | 0.262   | CCL23             | 0.085   | MMP12   | 0.882   |
| <b>CD40.L</b> | 0.035   | <b>ADA</b>             | 0.041   | IL12                   | 0.631   | CD5               | 0.464   | CXCL13  | 0.104   |
| <b>CD244</b>  | 0.006   | CD4                    | 0.496   | CCL19                  | 0.738   | CCL3              | 0.883   | PD.L2   | 0.62    |
| <b>EGF</b>    | 0.001   | NOS3                   | 0.444   | MCP.2                  | 0.056   | MMP7              | 0.157   | VEGFA   | 0.525   |
| <b>ANGPT2</b> | 0.006   | CD83                   | 0.187   | CCL4                   | 0.663   | ARG1              | 0.386   | IL4     | 0.356   |
| IL7           | 0.164   | <b>Gal.9</b>           | 0.006   | IL15                   | 0.074   | NCR1              | 0.36    | LAG3    | 0.276   |
| PGF           | 0.071   | <b>VEGFR.2</b>         | 0.016   | Gal.1                  | 0.798   | DCN               | 0.062   | IL12RB1 | 0.559   |
| <b>IL6</b>    | 0.037   | CD40                   | 0.686   | CD27                   | 0.075   | TNFRSF 21         | 0.052   | IL13    | 0.103   |
| ADGRG1        | 0.549   | IL18                   | 0.239   | <b>CXCL5</b>           | 0.004   | TNFRSF 4          | 0.058   | TNF     | 0.19    |
| MCP.1         | 0.065   | GZMH                   | 0.094   | IL-5                   | 0.944   | MIC.A.B           | 0.674   | KLRD1   | 0.197   |
| CRTAM         | 0.14    | KIR3DL1                | 0.663   | <b>HGF</b>             | 0.02    | <b>CCL17</b>      | 0.005   | GZMB    | 0.413   |
| CXCL11        | 0.566   | <b>LAP.TGF.beta .1</b> | 0.009   | GZMA                   | 0.663   | ANGPT1            | 0.813   |         |         |
| MCP.4         | 0.417   | <b>CXCL1</b>           | 0.023   | HO.1                   | 0.291   | PTN               | 0.062   |         |         |
| <b>TRAIL</b>  | 0.004   | TNFSF14                | 0.732   | CX3CL1                 | 0.985   | <b>CXCL12</b>     | 0.027   |         |         |
| PD.L1         | 0.315   | <b>CSF.1</b>           | 0.023   | CXCL10                 | 0.243   | IFN.gam ma        | 0.415   |         |         |

**Figure S1. Plasma APOL1 level in patients with COVID19 correlates with markers of endothelial dysfunction and kidney disease severity. Related to Figure 1.**

- A. Association between *APOL1* risk alleles (recessive model) and sepsis phenotypes in the MVP cohort. All analyses were adjusted for age, sex, GFR and ancestry.
- B. Plasma ANGPT2 levels in patients with and without AKI in the MESSI cohort. \* $p < 0.05$ .
- C. Plasma creatinine levels in AKI and non-AKI event (74 samples from 30 individuals) in the COVID19 study. AKI events were defined according to KDIGO criteria. \*\*\* $p < 0.001$ .
- D. The correlation between plasma APOL1 level and eGFR.
- E. Urine APOL1 levels in No AKI and AKI samples. ns: not statistically significant.
- F. O-link inflammation panel target 92 inflammation-related protein biomarkers. The proteins highlighted in red significantly related to APOL1 level.

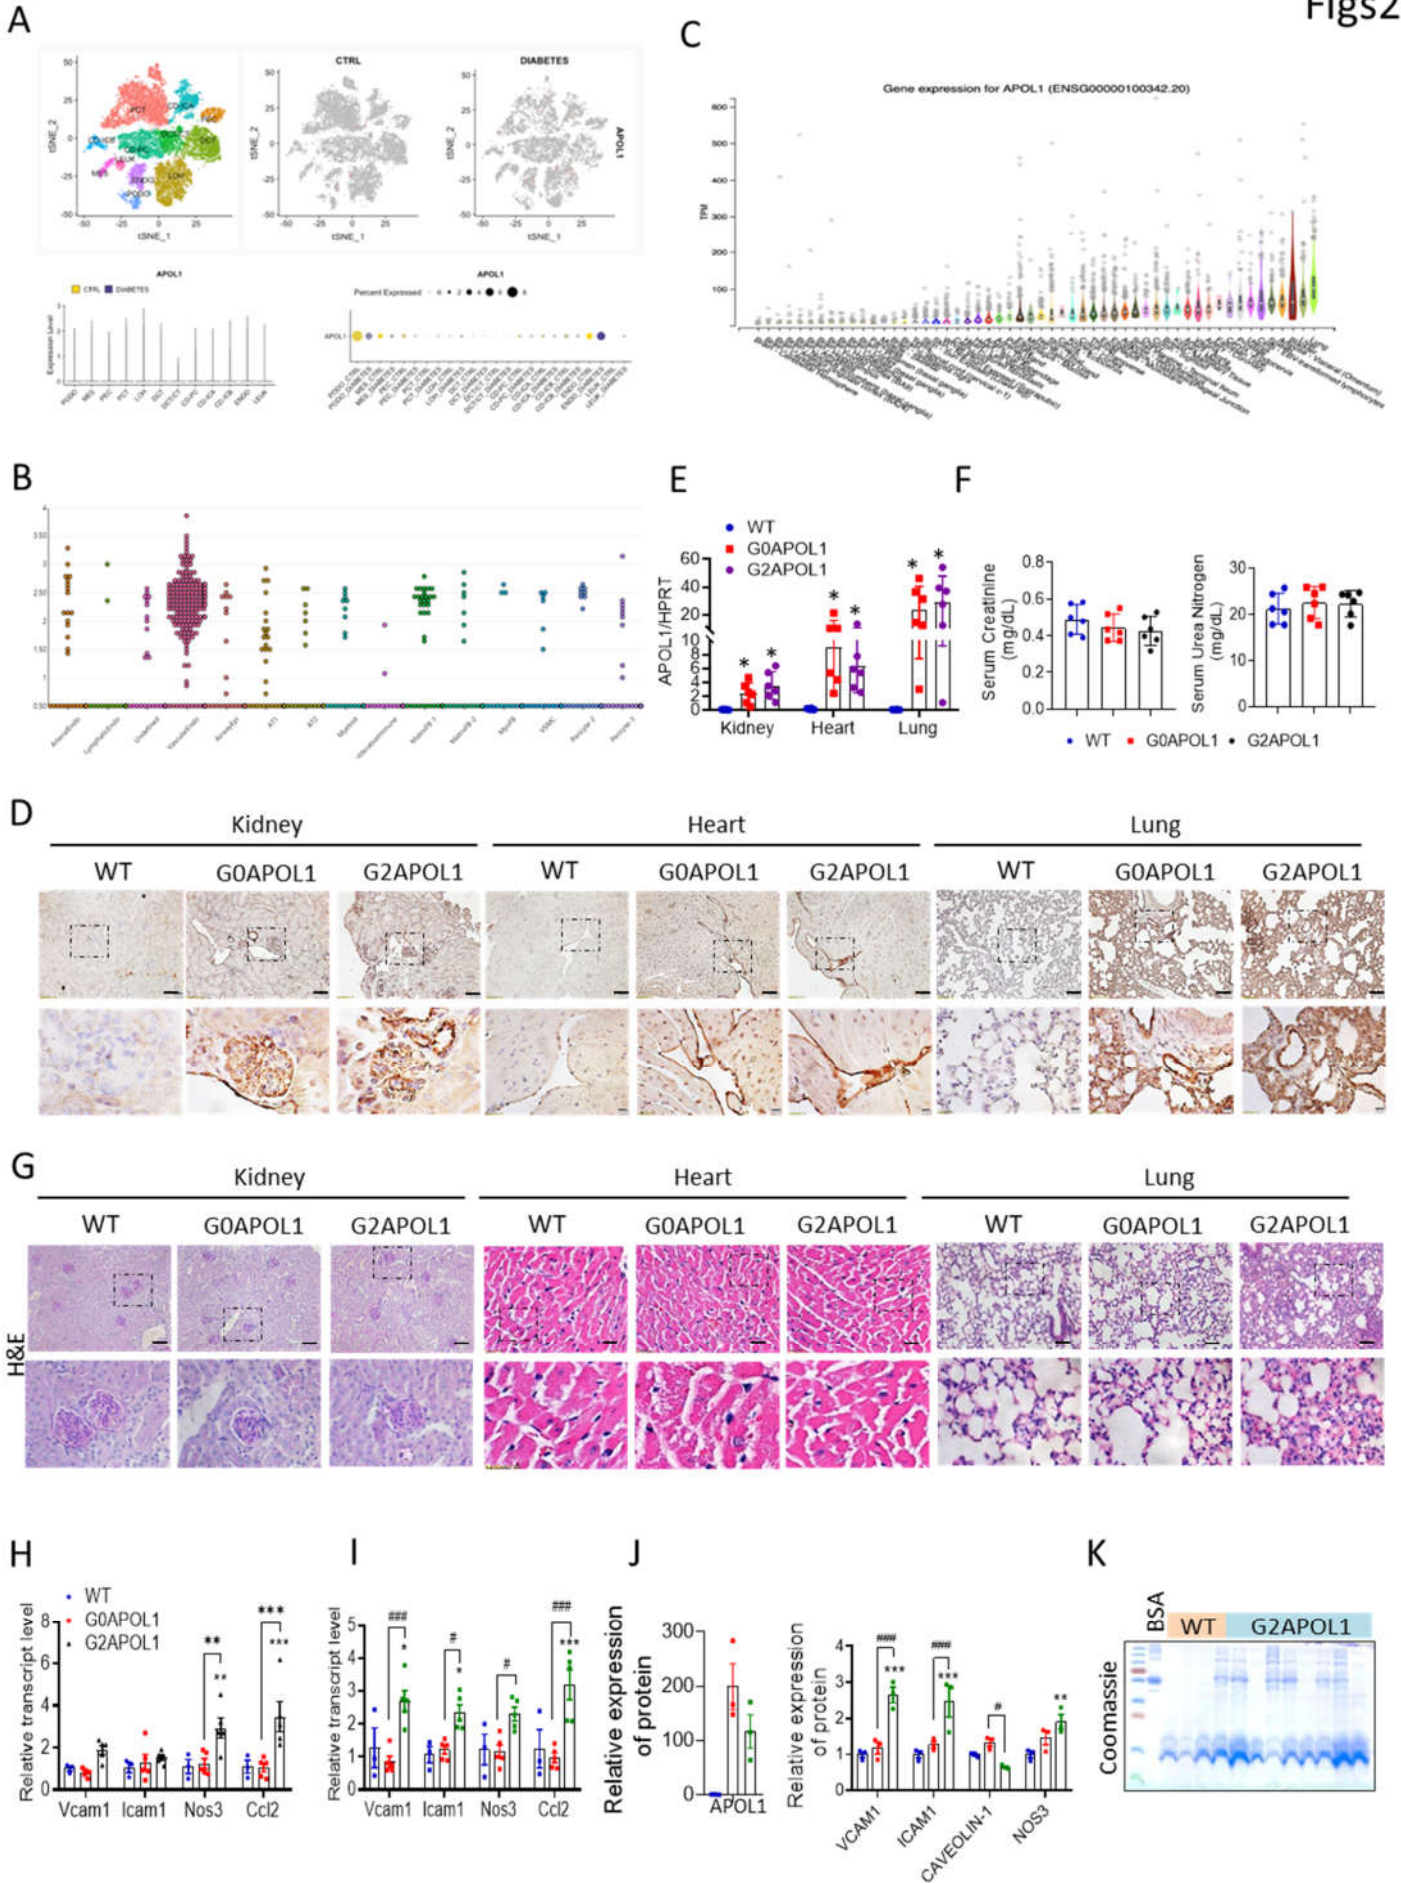

**Figure S2: Generation of a mouse model with cell-type-specific inducible expression of *APOL1* variants.**  
**Related to Figure 2.**

- A. Single cell expression distribution of *APOL1* in human kidney. Data downloaded from Humphreys lab (<https://humphreyslab.com>)
- B. Single cell expression distribution of *APOL1* in human lung. Data downloaded from LungGENS database (<https://research.cchmc.org/pbge/lunggens/default.html>);
- C. *APOL1* expression in different human tissue samples. Data was downloaded from GTEX database ([www.Gtex.org](http://www.Gtex.org))
- D. Immunohistochemical analysis of green fluorescent protein (GFP) in the kidney, heart and lung of WT, EC/*GOAPOL1* and EC/*G2APOL1* mice. Brown staining indicates GFP expression. Scale bar =20  $\mu$ M.
- E. Relative *APOL1* transcript level in kidneys of WT (N = 5), EC/*GOAPOL1* (N = 6) and EC/*G2APOL1* (N = 6) mice. *APOL1* mRNA level is normalized to HPRT; \* $p < 0.05$ , vs WT.
- F. Serum creatinine and urea nitrogen levels in WT (N = 6), EC/*GOAPOL1* (N = 6), and EC/*G2APOL1* mice. ns - not statistically significant.
- G. Representative images of H&E-stained lung, kidney and heart section from WT, EC/*GOAPOL1* and EC/*G2APOL1* mice. Scale bar=20  $\mu$ m.
- H. Relative mRNA levels of *Vcam1*, *Icam1*, *Nos3*, and *Ccl2* were evaluated in hearts of WT (N = 3), EC/*GOAPOL1* (N = 5) and EC/*G2APOL1* (N = 5) mice.; \*\* $p < 0.01$ , \*\*\* $p < 0.001$  vs WT; ## $p < 0.01$ , ### $p < 0.001$  vs. indicated group.
- I. Relative mRNA levels of *Vcam1*, *Icam1*, *Nos3*, and *Ccl2* were evaluated in lungs of WT (N = 3), EC/*GOAPOL1* (N = 5) and EC/*G2APOL1* (N = 5) mice.; \* $p < 0.05$ , \*\*\* $p < 0.001$  vs WT; # $p < 0.05$ , ### $p < 0.001$  vs. indicated group.
- J. Densitometric quantification of levels of *APOL1*, *Icam1*, *Vcam1*, Caveolin-1, and eNOS normalized to GAPDH in lung tissues of WT, EC/*GOAPOL1* and EC/*G2APOL1* mice as shown in Figure 1I. N = 3 independent experiments; \*\* $p < 0.01$ , \*\*\* $p < 0.001$  vs WT.
- K. Coomassie blue-stained SDS-PAGE gel of urine samples from WT (N = 3), and EC/*G2APOL1* (N = 9) mice.

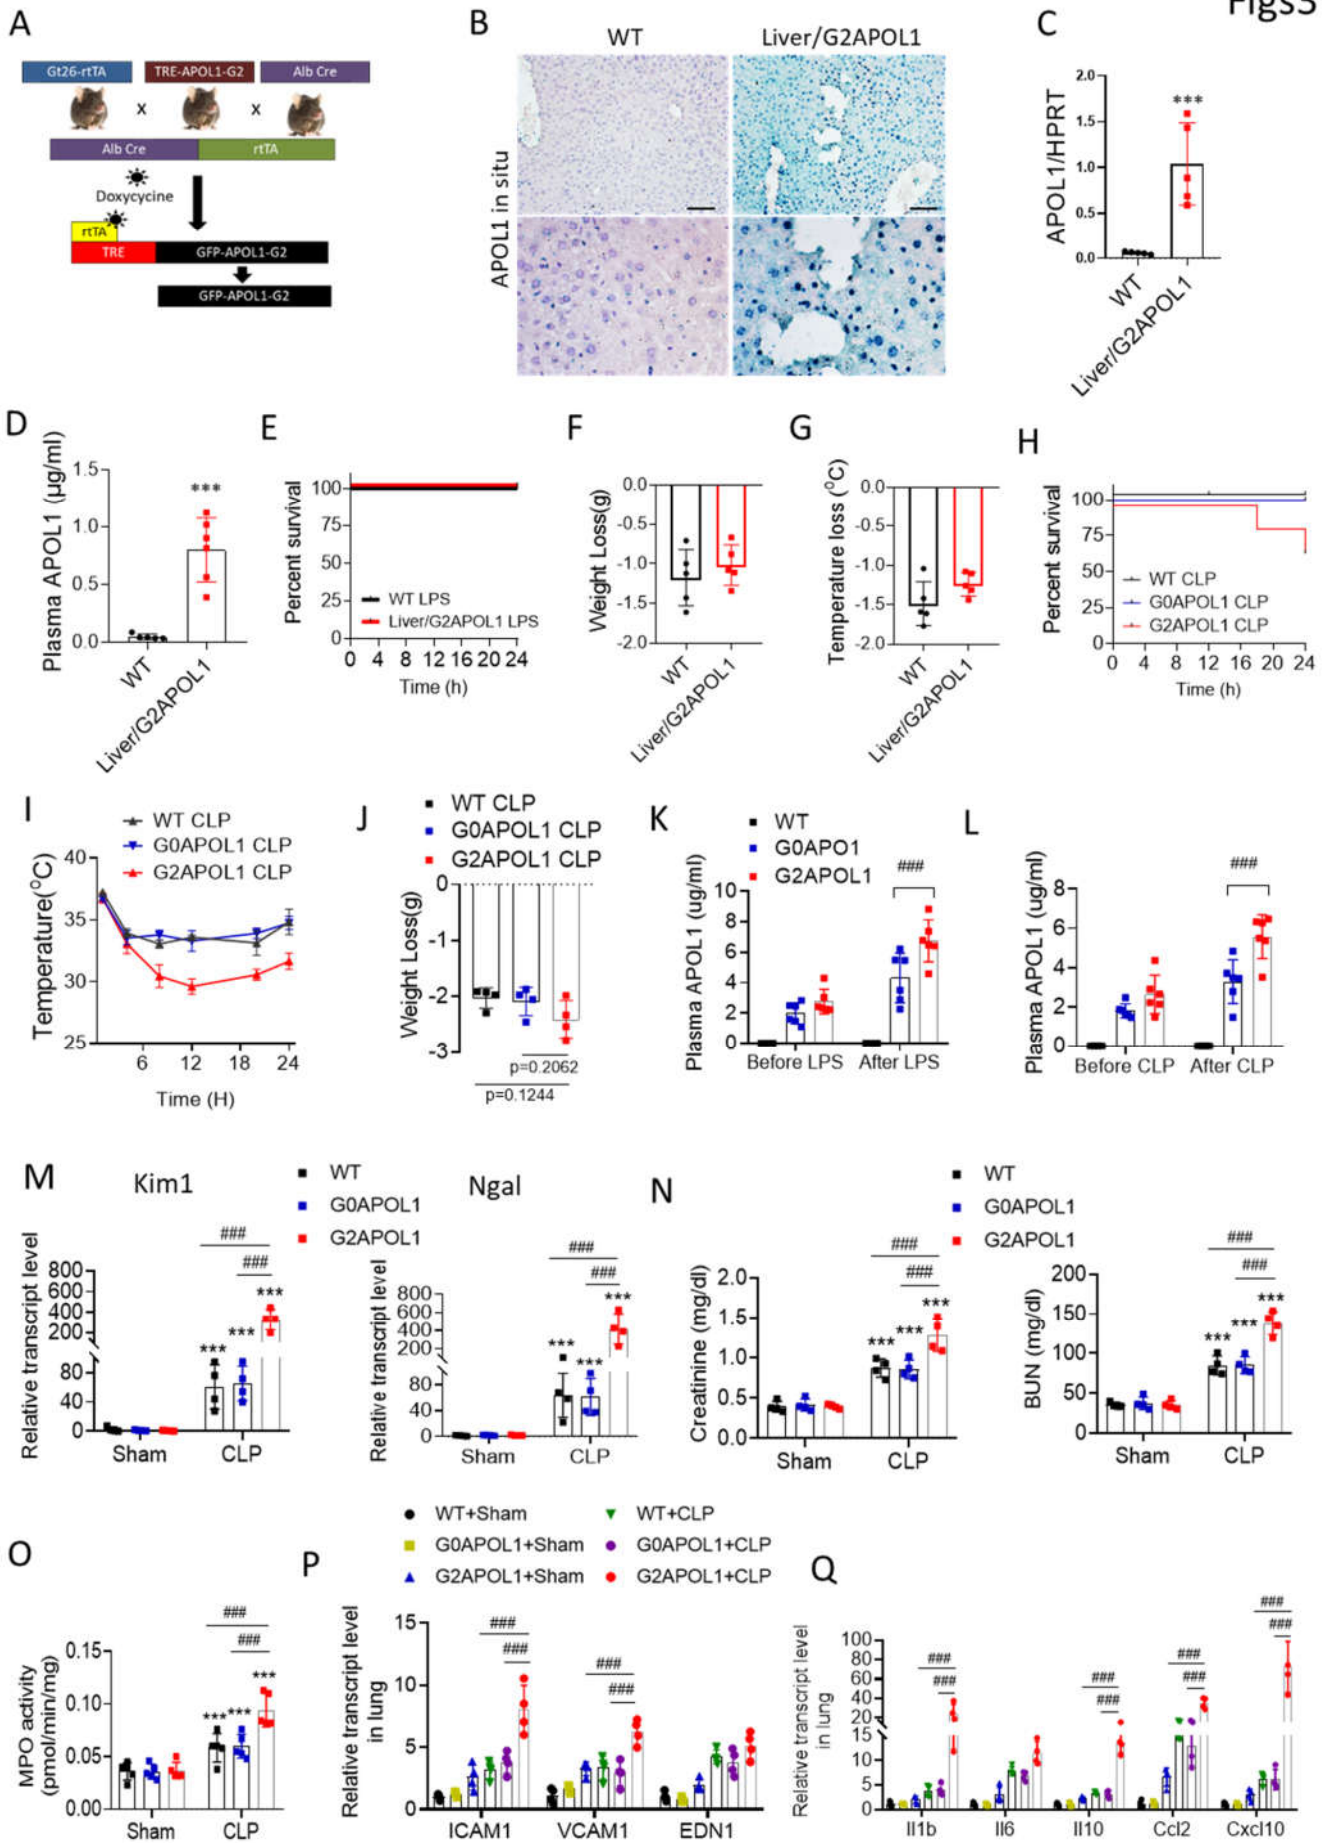

**Figure S3. Increased sepsis severity in endothelial EC/G2APOL1 mice. Related to Figure 3.**

- A. Experimental design for the generation of the *Gt26-rtTA/TREG2APOL1-GFP /Alb Cre (Liver/G2APOL1)* mice.
- B. Representative images of APOL1 in situ hybridization in liver of WT and liver/*G2APOL1* mice. Scale bar=100  $\mu$ m.
- C. Relative APOL1 transcript level in liver of WT (N = 5) and Liver/*G2APOL1* (N = 5) mice. APOL1 mRNA level is normalized to HPRT; \*\*\* $p < 0.001$ , vs WT.
- D. Plasma APOL1 level in WT (N=5) and Liver/*G2APOL1* (N=6) mice. \*\*\* $p < 0.001$ , vs WT.
- E. Survival following intraperitoneal injection of LPS (6mg/kg) in WT (N=5) and Liver/*G2APOL1* (N=5) mice.
- F. Weight loss after intraperitoneal injection of LPS (6mg/kg) at 24h in WT (N=5) and Liver/*G2APOL1* (N=5) mice.
- G. Body temperature response to saline or LPS in WT (N=5) and Liver/*G2APOL1* (N=5) mice.
- H. Survival after cecal ligation and puncture (CLP) or sham operation in WT (N = 4), EC/*GOAPOL1* (N = 4) and EC/*G2APOL1* (N = 8) mice.
- I. Rectal temperature in CLP or sham operated WT, EC/*GOAPOL1* and EC/*G2APOL1* mice.
- J. Weight loss after 24 hours of CLP or sham operation of WT, EC/*GOAPOL1* and EC/*G2APOL1* mice.
- K. Serum APOL1 was measured at the time or 24 hours after LPS injection in WT, EC/*GOAPOL1* and EC/*G2APOL1* mice; ### $p < 0.001$  vs. indicated group.
- L. Serum APOL1 was measured either before or 24 hours after CLP operation in WT, EC/*GOAPOL1* and EC/*G2APOL1* mice; ### $p < 0.001$  vs. indicated group.
- M. Relative transcript level of AKI injury markers; Kidney injury Kim1 and Ngal in the kidneys of control (N = 4), EC/*GOAPOL1* (N = 4) and EC/*G2APOL1* (N = 4) mice; \*\*\* $p < 0.001$  vs *sham*; ### $p < 0.001$  vs. indicated group.
- N. Renal function of WT, EC/*GOAPOL1* and EC/*G2APOL1* mice 24hour after either CLP or sham operation in WT (N = 4), EC/*GOAPOL1* (N = 4) and EC/*G2APOL1* (N = 4) mice, assessed by serum BUN and creatinine. \*\*\* $p < 0.001$  vs *sham*; ### $p < 0.001$  vs. indicated group.
- O. MPO activity was measured at 24 hours in lungs of mice undergoing CLP or sham operation in WT (N=4), EC/*GOAPOL1* (N = 4) and EC/*G2APOL1* (N=4) mice; \*\* $p < 0.01$  and \*\*\* $p < 0.001$  vs *sham*; ## $p < 0.01$  vs. indicated group.
- P. Relative mRNA levels of Vcam1, Icam1, and Edn1 were evaluated in lungs of WT (N = 4), EC/*GOAPOL1* (N = 4) and EC/*G2APOL1* (N = 4) mice; \*\*\* $p < 0.001$  vs WT; # $p < 0.05$ , ## $p < 0.01$ , ### $p < 0.001$  vs. indicated group.
- Q. Relative mRNA levels of Il1b, Il6, Il10, Ccl2 and Cxcl10 in lungs of WT (N = 4), EC/*GOAPOL1* (N = 4) and EC/*G2APOL1* (N = 4) mice.; \*\* $p < 0.01$ , \*\*\* $p < 0.001$  vs WT; ## $p < 0.01$ , ### $p < 0.001$  vs. indicated group.

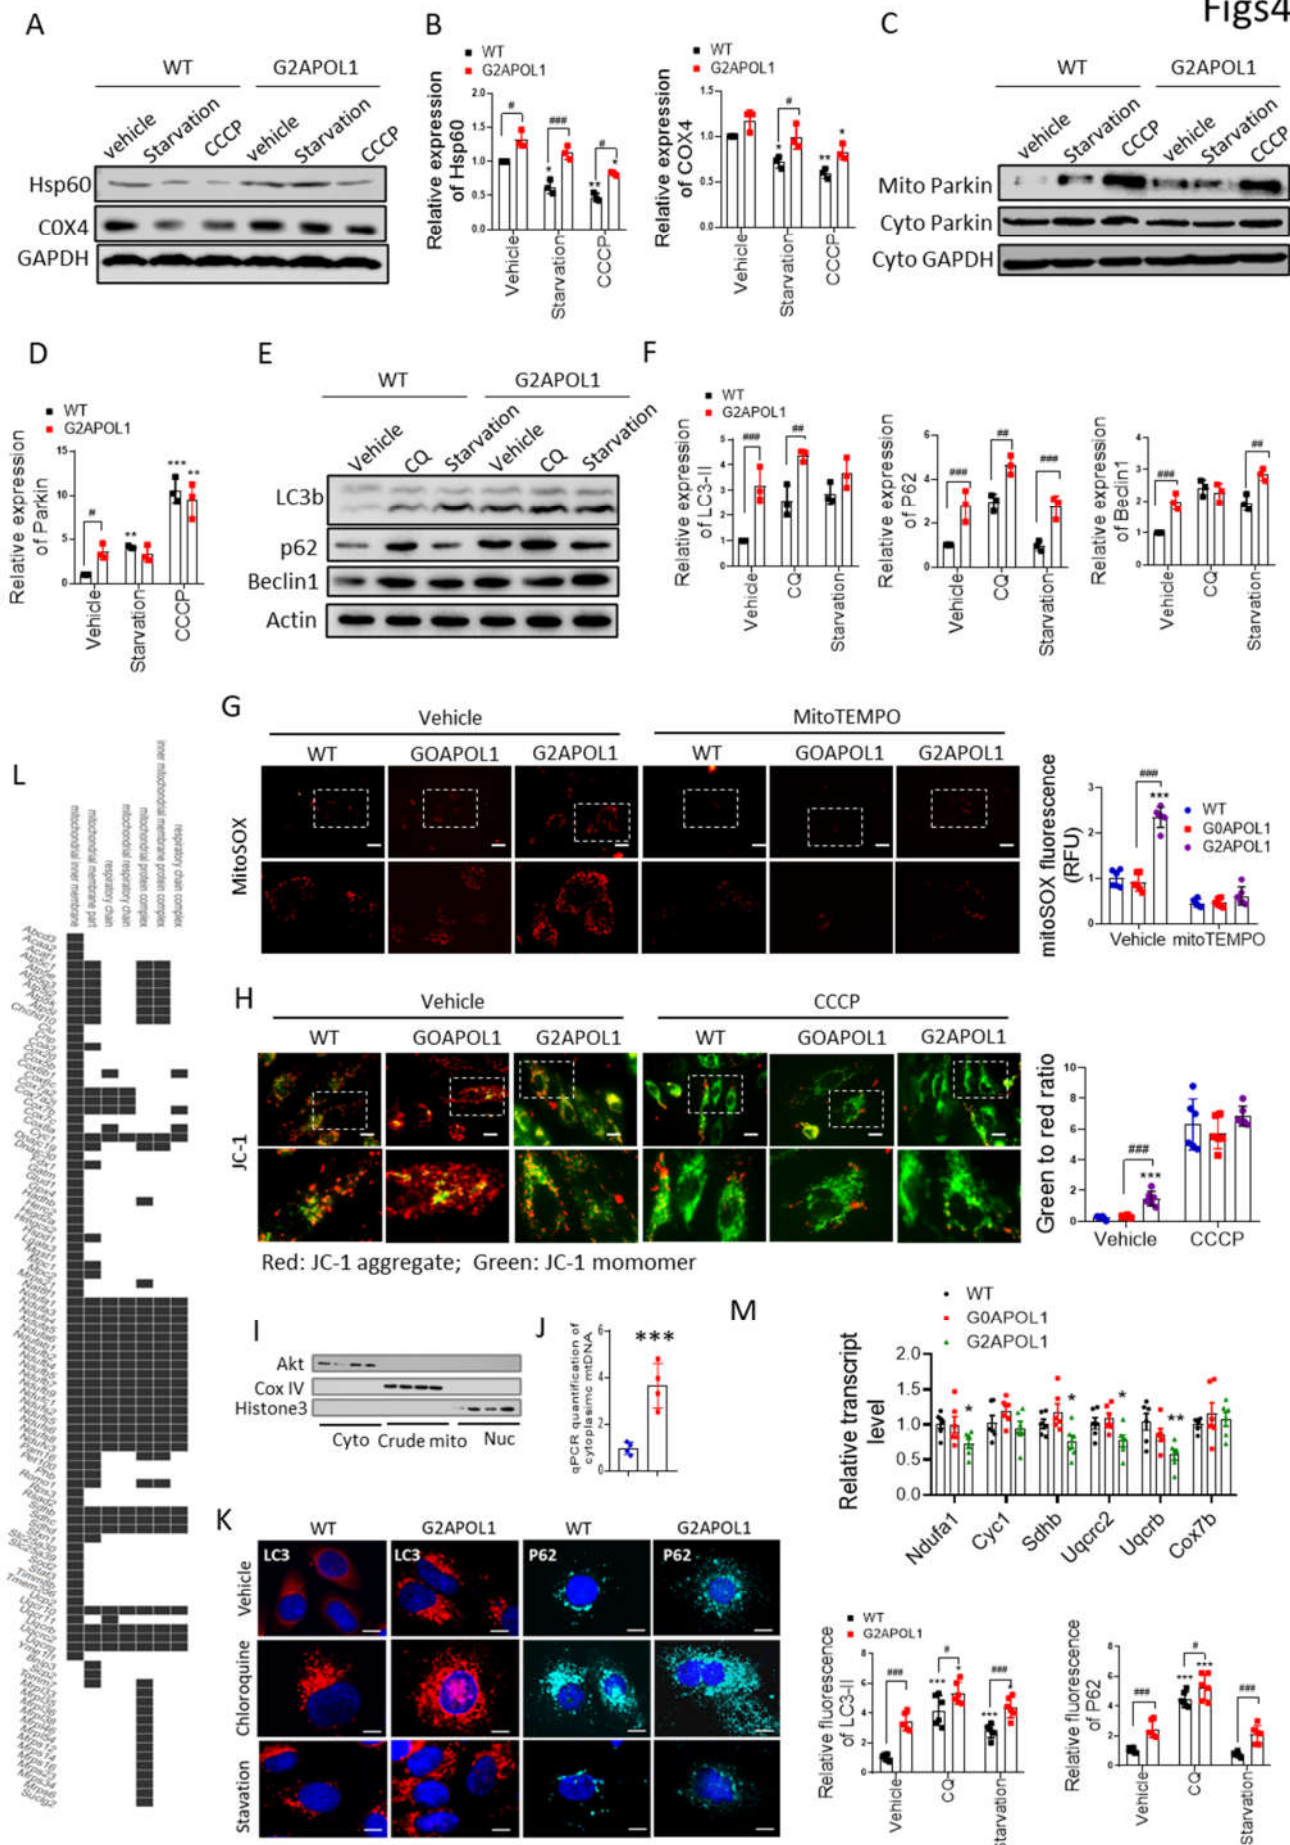

**Figure S4. G2APOL1 induced mitophagy defect and mitochondrial dysfunction. Related to Figure 5.**

- A. Western blot analysis of mitochondrial markers (Cox4 and Hsp 60) in WT and *G2APOL1* ECs treated with vehicle, starvation (HBSS, 4h), or CCCP (40uM, 2h).
- B. Densitometric quantification of Cox4 and HSP60 normalized to GAPDH. N = 3 independent experiments; \*p < 0.05 and \*\*p < 0.01 vs. *Vehicle*; #p < 0.05, ###p < 0.001 vs. indicated group.
- C. Western blot analysis of the mitochondrial and cytosolic fraction of Parkin in WT and *G2APOL1* ECs treated as in A.
- D. Densitometric quantification of mitochondrial fraction of Parkin normalized to cytosolic GAPDH. N = 3 independent experiments; \*\*p < 0.01 and \*\*\*p < 0.001 vs. *Vehicle*; #p < 0.05 vs. indicated group.
- E. Immunoblot analysis using antibodies against LC3, p62, Beclin1 or GAPDH in WT and *G2APOL1* ECs treated with Vehicle, Chloroquine (100uM, 6h) and starvation (HBSS, 4h).
- F. Densitometric quantification of LC3II, Beclin1 and p62 levels in panel I. N = 3 independent experiments; \*p < 0.05 and \*\*p < 0.01 vs. *Vehicle*; ##p < 0.01, ###p < 0.001 vs. indicated group.
- G. mtROS levels measured by MitoSOX staining in WT, *GOAPOL1* and *G2APOL1* ECs treated with vehicle or mitoTEMPO (100nM, 4h). Representative images are shown. Scale bar=10µm. (Right panel) Quantification of the mtROS. \*\*\*p < 0.001 vs *Vehicle*; ###p < 0.001 vs. indicated group.
- H. Mitochondrial membrane potential ( $\Delta\psi_m$ ) was determined by JC-1 assay in WT, *GOAPOL1* and *G2APOL1* ECs treated with vehicle or CCCP (40uM, 2h), Scale bar = 10 µm. (Right panel) Quantification of the JC-1 fluorescence ratio in the experiment shown in panel C. \*\*\*p < 0.001 vs *Vehicle*;
- I. Expression of cell fraction markers Akt (cytosol), Cox4 (mitochondria) and Histone 3 (nucleus) by Western blot. N = 3 independent experiments.
- J. Cytosolic mtDNA genes were normalized to respective nuclear Rpl13a and presented as fold enrichment over media-treated controls.
- K. Representative immunofluorescence images of LC3 and p62 antibody staining in WT and *G2APOL1* ECs treated with vehicle, starvation (HBSS, 4h) and chloroquine (100uM, 6h). Scale bar = 10 µm. (Right panel). Quantification of the LC3 and P62 in the experiment shown in panel H; \*p < 0.05, \*\*\*p < 0.001 vs *WT*; #p < 0.05, ###p < 0.001 vs. indicated group. N = 6 independent experiments (over 50 cells were counted in each case).
- L. Heat map view representing the functional classification of differentially expressed genes in *G2APOL1* endothelial cells.
- M. Relative mRNA levels of OXPHOS genes were evaluated in WT (N = 3), *GOAPOL1* (N = 5) and *G2APOL1* (N = 5) ECs. \*p < 0.05, \*\*p < 0.01, \*\*\*p < 0.001 vs *WT*.



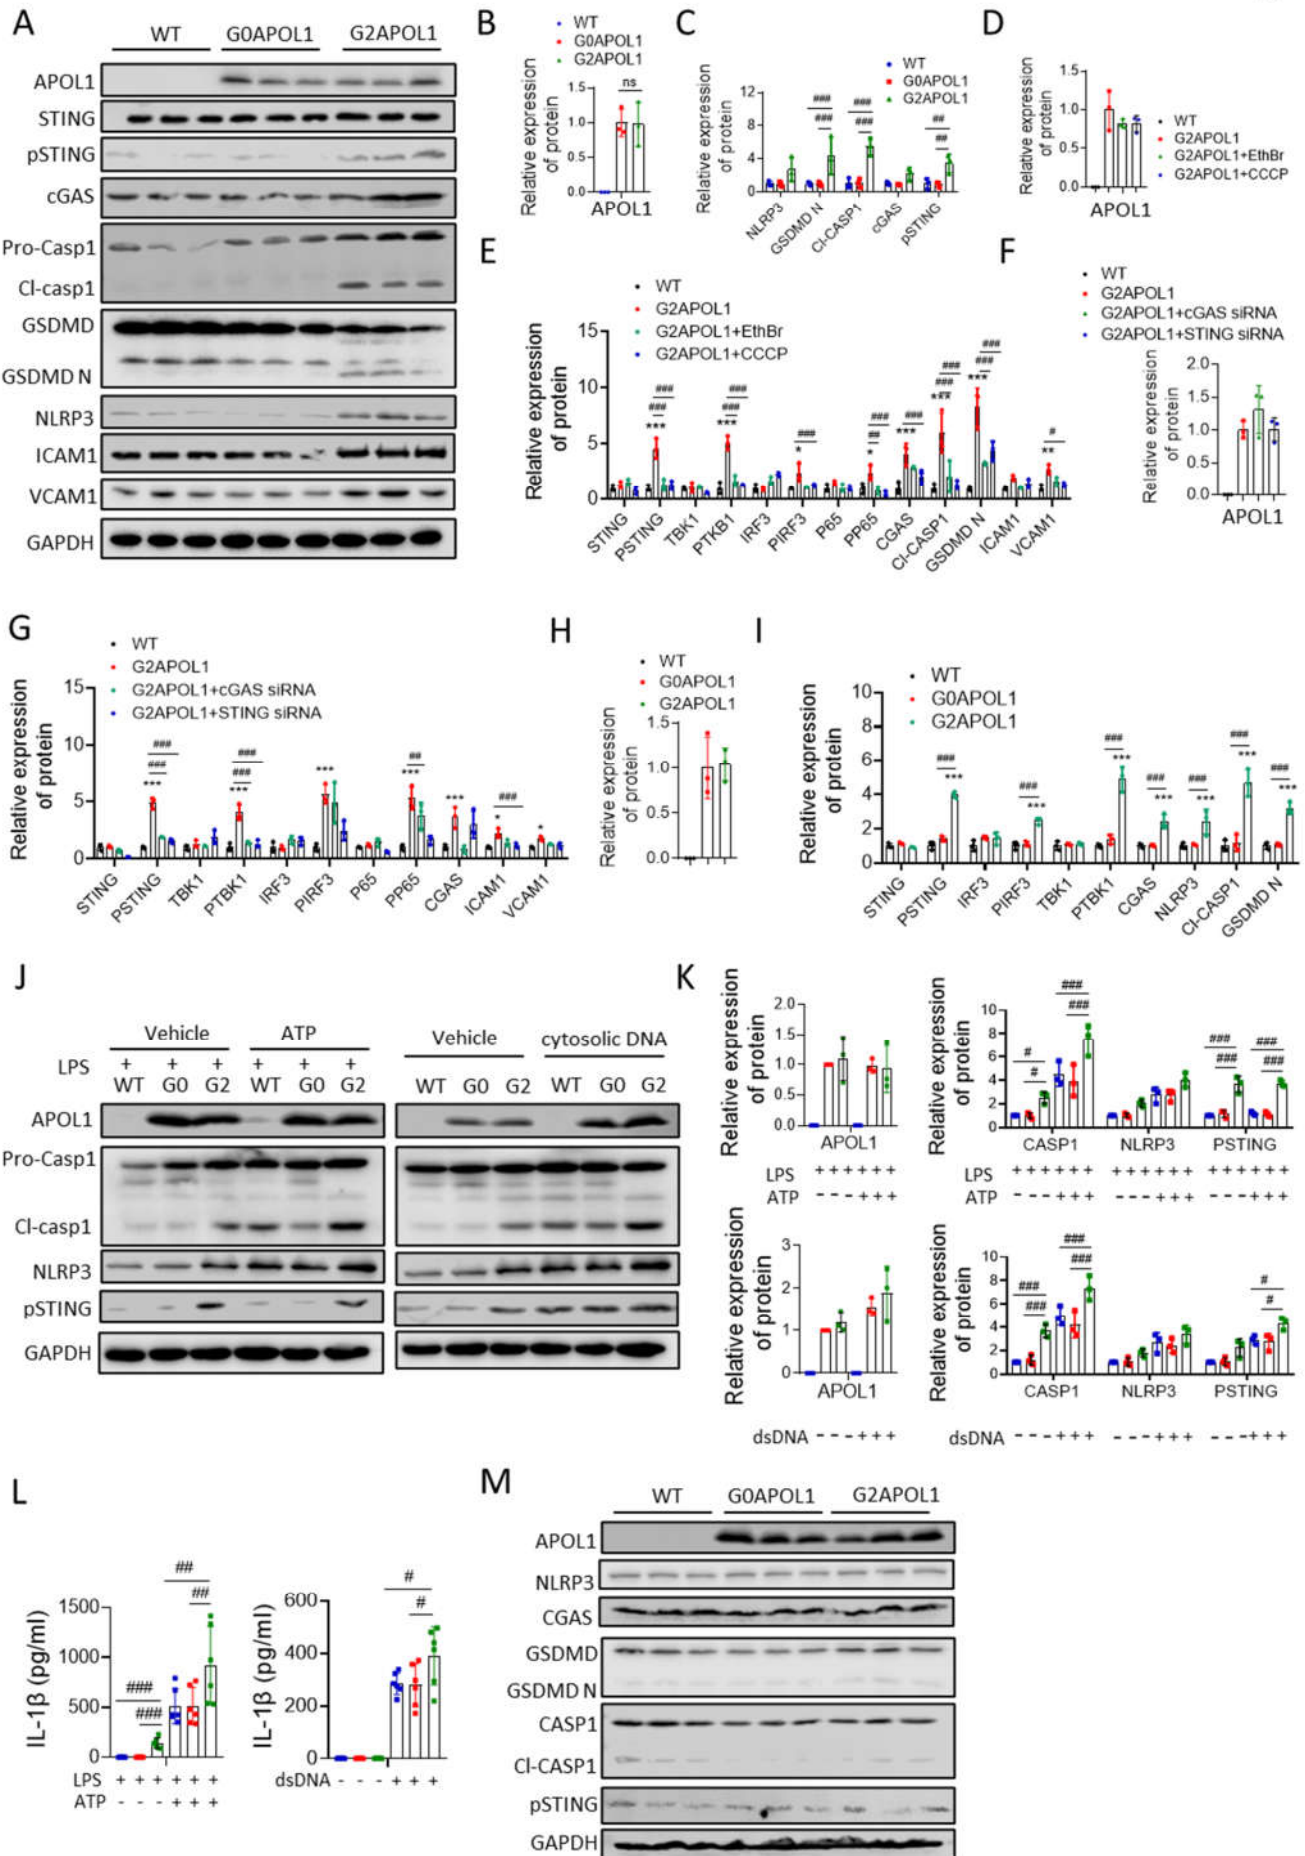

**Figure S5. Mitophagy defect in G2APOL1 ECs results in cytosolic mtDNA leakage, inflammasome and STING activation leading to an inflammatory, pro-adhesive endothelial phenotype. Related to Figure 6.**

- A. Protein expression of APOL1, ICAM1, VCAM1, inflammasome (NLRP3, GSDMD, CASP1) and cytosolic nucleotide sensors (STING, pSTING, cGAS) were analysed by immunoblotting in WT, *GOAPOL1* and *G2APOL1* ECs.
- B. Densitometric quantification of APOL1 in panel A, normalized to GAPDH. N = 3 independent experiments.
- C. Densitometric quantification of ICAM1, VCAM1, NLRP3, GSDMD N, cl-Caspase1, cGAS and pSTING in panel A, normalized to GAPDH. ##p < 0.01, ###p < 0.001 vs. indicated group.
- D. Densitometric quantification of APOL1 in figure 6A, normalized to GAPDH. N = 3 independent experiments.
- E. Densitometric quantification of ICAM1, VCAM1, STING, pSTING, TBK1, pTBK1, IRF3, pIRF3, p65, P-P65, CGAS, cl-CASP1, and GSDMD N in Figure 6A, normalized to GAPDH. \*p < 0.05, \*\*p < 0.01, \*\*\*p < 0.001 vs. WT; #p < 0.05, ##p < 0.01, and ###p < 0.001 vs. indicated group.
- F. Densitometric quantification of APOL1 in figure 6C, normalized to GAPDH. N = 3 independent experiments.
- G. Densitometric quantification of ICAM1, VCAM1, STING, pSTING, TBK1, pTBK1, IRF3, pIRF3, P65, p-P65, and CGAS, in Figure 6C, normalized to GAPDH. N = 3 independent experiments; \*p < 0.05, \*\*p < 0.01, \*\*\*p < 0.001 vs. WT; #p < 0.05, ##p < 0.01, and ###p < 0.001 vs. indicated group.
- H. Densitometric quantification of APOL1 in figure 6E, normalized to GAPDH. N = 3 independent experiments.
- I. Densitometric quantification of STING, pSTING, TBK1, pTBK1, IRF3, pIRF3, CGAS, cl-CASP1, and GSDMD N in Figure 6E, normalized to GAPDH. N = 3 independent experiments; \*p < 0.05, \*\*p < 0.01, \*\*\*p < 0.001 vs. WT; #p < 0.05, ##p < 0.01, and ###p < 0.001 vs. indicated group.
- J. (Left panel) WT, *GOAPOL1* and *G2APOL1* ECs were incubated with LPS and ATP. (Right panel) ECs cells (WT, *GOAPOL1* and *G2APOL1*) were transfected with DNA lysate isolated from damaged cells. Protein expression of APOL1, pSTING, Caspase1 and NLRP3 were analysed by immunoblot analysis.
- K. Densitometric quantification of APOL1, pSTING, Caspase1 and NLRP3 in panel J, normalized to GAPDH. N = 3 independent experiments; \*p < 0.05, \*\*p < 0.01, \*\*\*p < 0.001 vs. WT; #p < 0.05, ##p < 0.01, and ###p < 0.001 vs. indicated group.
- L. Cell culture supernatant IL-1 beta of WT (N = 6), *GOAPOL1* (N = 6) and *G2APOL1* (N = 6) ECs treated as panel J; #p < 0.05, ##p < 0.01, and ###p < 0.001 vs. indicated group.
- M. Protein expression of NLRP3, CGAS, GSDMD, Caspase 1, pSTING and GAPDH were analysed by immunoblotting in liver of WT, liver/*GOAPOL1* and liver/*G2APOL1* mice. N = 3 independent experiments.

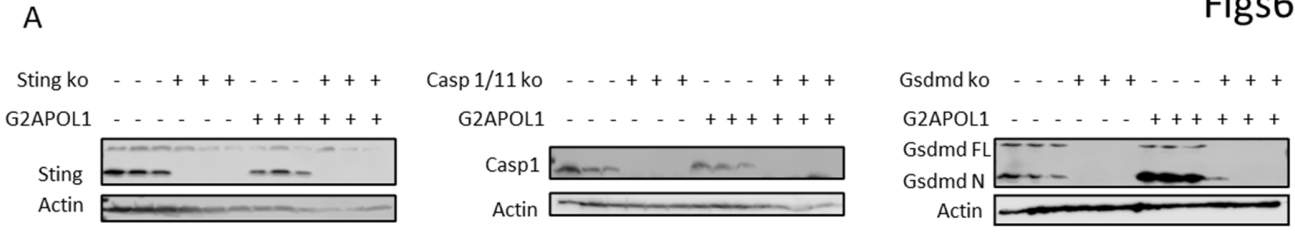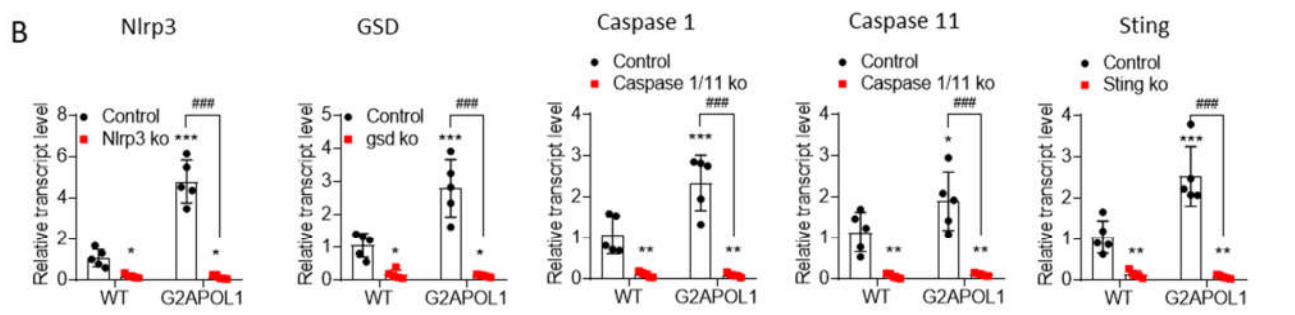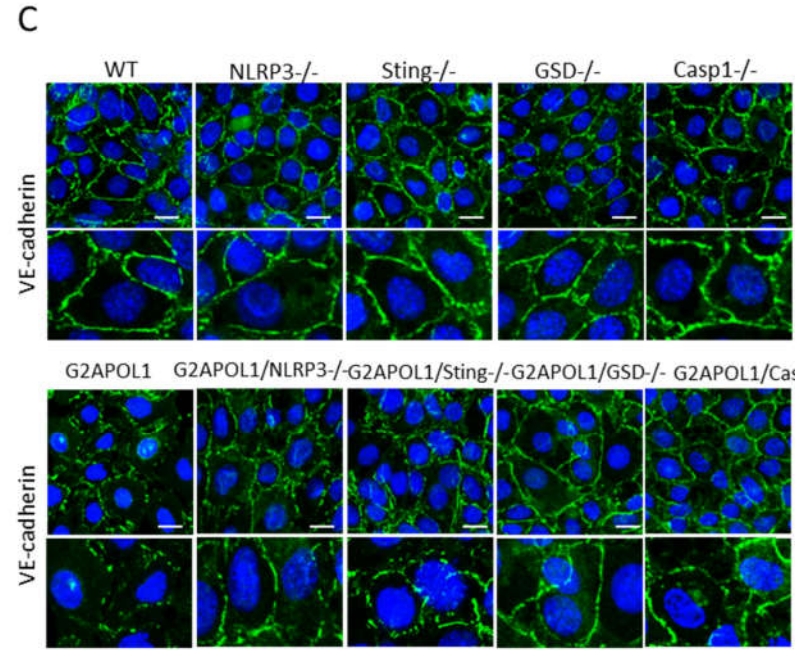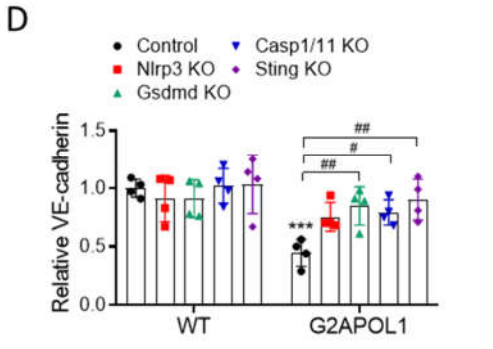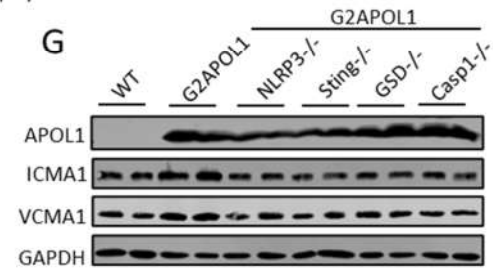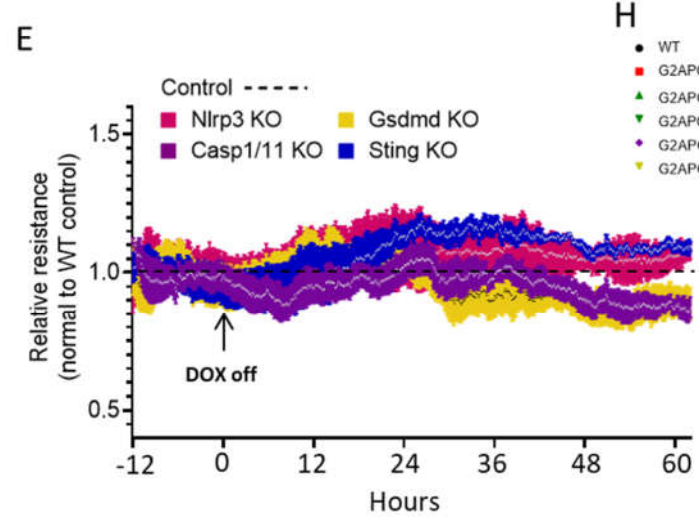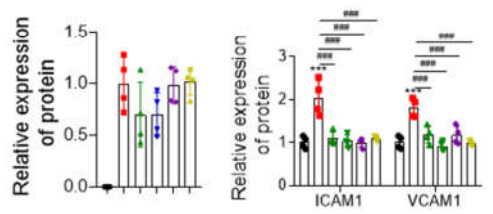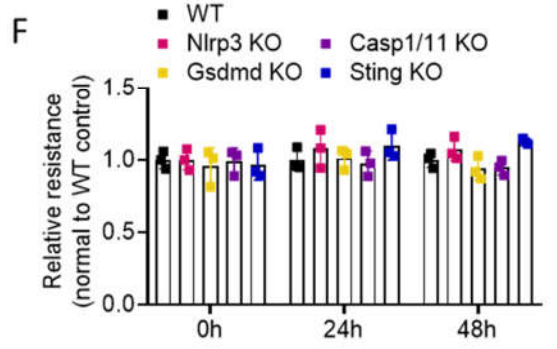

**Figure S6. Genetic deletion of Nlrp3, Gsdmd, Caspase 1/11 or Sting in G2APOL1 transgenic mice. Related to Figure 7.**

- A. Western blots of whole lung lysates from *G2APOL1/Nlrp3* WT and *G2APOL1/NLRP3* KO mice, showing levels NLRP3, APOL1, caspase-1, cleaved caspase-1, caspase-11, cleaved caspase-11, and GAPDH.
- B. Relative *Nlrp3*, *Gsdmd*, *Caspase 1*, *Caspase 11* and *Sting* transcript level in lung of WT/*Nlrp3*<sup>-/-</sup>, WT/*Gsdmd*<sup>-/-</sup>, WT/*Caspase 1/11*<sup>-/-</sup>, WT/*Sting*<sup>-/-</sup>, *G2APOL1/Nlrp3*<sup>-/-</sup>, *G2APOL1/Gsdmd*<sup>-/-</sup>, *G2APOL1/Caspase 1/11*<sup>-/-</sup>, and *G2APOL1/Sting*<sup>-/-</sup> mice. \*p<0.05, \*\*\*p<0.01, \*\*\*\*p<0.001 vs WT control; ####p < 0.001 vs. indicated group.
- C. Immunofluorescence analysis of VE-cadherin in indicated groups. Scale bar = 10 μm.
- D. Quantification of VE-cadherin as shown in C. \*\*\*p<0.001 vs WT control; #p < 0.05, ##p < 0.01 vs. indicated group.
- E. TEER (measured in real time by ECIS) in ECs from WT, EC/*G2APOL1*, *Nlrp3*<sup>-/-</sup>/*G2APOL1*, *Gsdmd*<sup>-/-</sup>/*G2APOL1*, *Casp 1/11*<sup>-/-</sup>/*G2APOL1* and *STING*<sup>-/-</sup>/*G2APOL1* mice. At each individual time point, TEER values were normalized to WT endothelial cells.
- F. Relative TEER at 0 hr, 24 hrs and 48 hrs after removal of doxycycline (APOL1 expression).
- G. Western blots of whole lung lysates from WT, EC/*G2APOL1*, *G2APOL1/Nlrp3*<sup>-/-</sup>, *G2APOL1/Gsdmd*<sup>-/-</sup>, *G2APOL1/Caspase 1/11*<sup>-/-</sup>, and *G2APOL1/Sting*<sup>-/-</sup> mice, showing levels of APOL1, ICAM1, VCAM1 and GAPDH.
- H. Densitometric quantification of APOL1, VCAM1 and ICAM1 in panel G, normalized to GAPDH. N = 4 independent experiments; \*\*\*p<0.001 vs. WT; and ####p < 0.001 vs. indicated group.

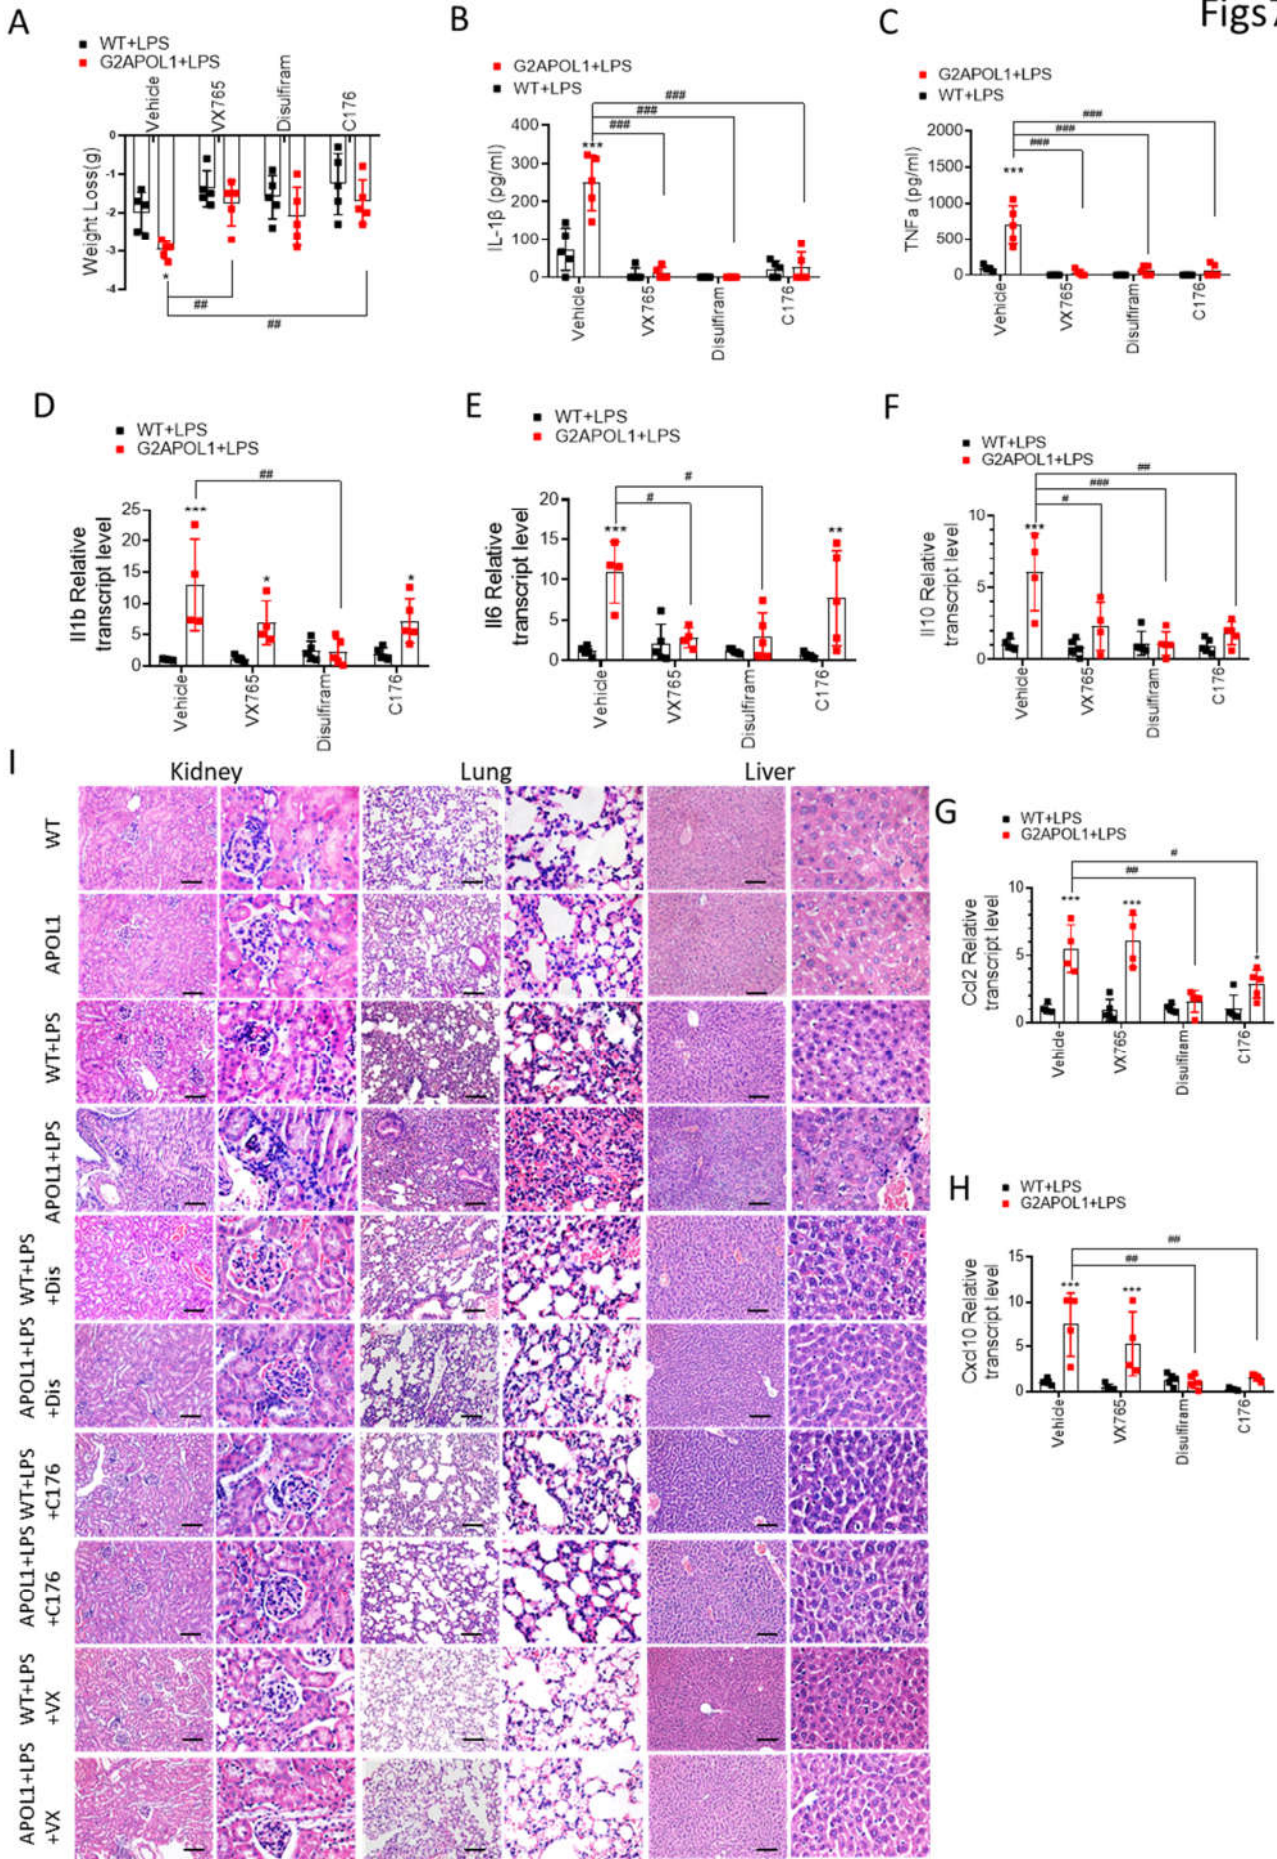

**Figure S7. Pharmacological inhibition of GSDMD, Caspase 1 and STING improves LPS induced sepsis in EC/G2APOL1 mice. Related to Figure 7.**

- A. Weight loss 24 hours after intraperitoneal injection of LPS (6mg/kg) in groups (N =5) as indicated. \* $p < 0.05$ , vs *WT+LPS*; ### $p < 0.01$  vs. indicated group.
- B. Serum interleukin 1 beta levels in groups (N =5) as indicated; \*\*\* $p < 0.001$  vs *WT+LPS*; #### $p < 0.001$  vs. indicated group.
- C. Serum TNF $\alpha$  levels in groups (N =5) as indicated; \*\*\* $p < 0.001$  vs *WT+LPS*; #### $p < 0.001$  vs. indicated group.
- D-H. Relative mRNA levels of *IL-1 $\beta$* , interleukin 6 (*IL6*), interleukin 10 (*IL10*), *Ccl2* and C-X-C Motif Chemokine Ligand 10 (*Cxcl10*) in the lung of mice as indicated (N =5); \* $p < 0.05$ , \*\* $p < 0.01$ , \*\*\* $p < 0.001$  vs *WT+LPS*; # $p < 0.05$ , ## $p < 0.01$  #### $p < 0.001$  vs. indicated group.
- I. Representative images of H&E-stained sections of kidneys, hearts, and lungs 24 hours after saline or LPS injection in WT, and EC/*G2APOL1* mice. Scale bar = 100 $\mu$ m

**Table S1: Patient's characteristics in MESSI cohort. Related to Figure 1**

| Clinical data   | Non-AKI<br>(N=26) | AKI<br>(N=44) | P value |
|-----------------|-------------------|---------------|---------|
| Age (y)         | 56.9 ± 16.5       | 63.2 ± 14.5   | 0.0998  |
| Male, n%        | 14 (54%)          | 21 (48%)      | 0.6208  |
| Black, n(%)     | 26 (100%)         | 44(100%)      | ns      |
| Hispanic, n(%)  | 2 (8%)            | 0 (0%)        | 0.0620  |
| Mortality, n(%) | 8 (30%)           | 18 (41%)      | 0.3962  |
| BMI             | 26.3 ± 6.4        | 32.9 ± 10.7   | 0.0057  |
| Apache III      | 73.5 ± 35.1       | 103.2 ± 37.2  | 0.0016  |

Data are expressed as medians, in parentheses percentages are given. Level of significance is set at  $p < 0.05$ .  
**Related to Figure 1.**

**Table S2: Patient's characteristics in COVID19 cohort. Related to Figure 1**

| Clinical data                | Non-AKI<br>(N=20) | AKI<br>(N=10) | P value |
|------------------------------|-------------------|---------------|---------|
| Age (y)                      | 55.6 ± 17.59      | 65.2 ± 20.94  | 0.1965  |
| Male, n%                     | 10                | 7             | 0.2974  |
| White, n(%)                  | 5 (25%)           | 1(10%)        | 0.3329  |
| Black, n(%)                  | 12 (60%)          | 7(70%)        | 0.5921  |
| Other/unknown/Asian,<br>n(%) | 3 (15%)           | 2(20%)        | 0.7290  |
| Mortality, n(%)              | 2 (10%)           | 3(30%)        | 0.1659  |
| Admitted to ICU, n(%)        | 10 (50%)          | 6(60%)        | 0.6048  |

Data are expressed as medians, in parentheses percentages are given. Level of significance is set at  $p < 0.05$ .

**Related to Figure 1.**



**Table S3: qPCR primer sequences. Related to STAR Methods. Related to STAR Methods**

| Gene   |                |                         |
|--------|----------------|-------------------------|
| Vcam1  | Forward Primer | AGTTGGGGATTTCGGTTGTTCT  |
|        | Reverse Primer | CCCCTCATTCCCTTACCACCC   |
| Icam1  | Forward Primer | GTGATGCTCAGGTATCCATCCA  |
|        | Reverse Primer | CACAGTTCTCAAAGCACAGCG   |
| Ccl2   | Forward Primer | TTAAAAACCTGGATCGGAACCAA |
|        | Reverse Primer | GCATTAGCTTCAGATTTACGGGT |
| GAPDH  | Forward Primer | AGGTCGGTGTGAACGGATTTG   |
|        | Reverse Primer | TGTAGACCATGTAGTTGAGGTCA |
| Sdc1   | Forward Primer | AACGGGCCTCAACAGTCAG     |
|        | Reverse Primer | CCGTGCGGATGAGATGTGA     |
| Sdc2   | Forward Primer | TGTGTCCGCAGAGACGAGAA    |
|        | Reverse Primer | GGAATCAGTTGGGATGTTGTCA  |
| Sdc3   | Forward Primer | AGAGGCCGGTGGATCTTGA     |
|        | Reverse Primer | CTCCTGCTCGAAGTAGCCAGA   |
| Sdc4   | Forward Primer | TTTGCCGTTTTCTGATCCTG    |
|        | Reverse Primer | TTGCCAAGTCGTAAGTCC      |
| Hpse   | Forward Primer | ACCGACGACGTGGTAGACTT    |
|        | Reverse Primer | GCAGGAGATAAGCCTCTAGCC   |
| Hyal1  | Forward Primer | ACCTGCTTCGCATCTCTACTC   |
|        | Reverse Primer | GGTTGGATACCACGGAACCTC   |
| Hyal2  | Forward Primer | AGATGTTTACCGACAGTCTTCAC |
|        | Reverse Primer | TGACGTAACGGAGAGTGTCAA   |
| Mmp2   | Forward Primer | CAAGTTCCCCGGCGATGTC     |
|        | Reverse Primer | TTCTGGTCAAGGTCACCTGTC   |
| Mmp9   | Forward Primer | CTGGACAGCCAGACACTAAAG   |
|        | Reverse Primer | CTCGCGCAAGTCTTCAGAG     |
| Mmp14  | Forward Primer | CAGTATGGCTACCTACCTCCAG  |
|        | Reverse Primer | GCCTTGCCTGTCACCTGTAAA   |
| Has1   | Forward Primer | GGCGAGCACTCACGATCATC    |
|        | Reverse Primer | AGGAGTCCATAGCGATCTGAAG  |
| Has2   | Forward Primer | TGTGAGAGGTTTCTATGTGTCCT |
|        | Reverse Primer | ACCGTACAGTCCAAATGAGAAGT |
| Sulf1  | Forward Primer | TGTGTTCCACCGTTCGGTC     |
|        | Reverse Primer | CACATCCTGGTCGTCAGTGAG   |
| Sulf2  | Forward Primer | CTGCCACTATGGCTGCTGTC    |
|        | Reverse Primer | GTTGGGCCGGATGTTCTCTG    |
| Nos3   | Forward Primer | GGCTGGGTTTAGGGCTGTG     |
|        | Reverse Primer | CTGAGGGTGTCTAGGTGATG    |
| Edn1   | Forward Primer | GCACCGGAGCTGAGAATGG     |
|        | Reverse Primer | GTGGCAGAAGTAGACACACTC   |
| Kim    | Forward Primer | ACATATCGTGGAATCACAACGAC |
|        | Reverse Primer | ACAAGCAGAAGATGGGCATTG   |
| Ngal   | Forward Primer | TGGCCCTGAGTGCATGTG      |
|        | Reverse Primer | CTCTTGTAGCTCATAGATGGTGC |
| Il1b   | Forward Primer | GCAACTGTTCTGAACTCAACT   |
|        | Reverse Primer | ATCTTTTGGGGTCCGTCAACT   |
| Il6    | Forward Primer | TAGTCCTTCTACCCCAATTTCC  |
|        | Reverse Primer | TTGGTCCTTAGCCACTCCTTC   |
| Il10   | Forward Primer | GCTCTTACTGACTGGCATGAG   |
|        | Reverse Primer | CGCAGCTCTAGGAGCATGTG    |
| Cxcl10 | Forward Primer | CCAAGTGCTGCCGTCATTTTC   |

---

|         |                |                         |
|---------|----------------|-------------------------|
|         | Reverse Primer | GGCTCGCAGGGATGATTTCAA   |
| Ifnb    | Forward Primer | CAGCTCCAAGAAAGGACGAAC   |
|         | Reverse Primer | GGCAGTGTAACCTTTCTGCA    |
| Nlrp3   | Forward Primer | ATTACCCGCCCCGAGAAAGG    |
|         | Reverse Primer | TCGAGCAAAGATCCACACAG    |
| Gsdmd   | Forward Primer | CCATCGGCCTTTGAGAAAGTG   |
|         | Reverse Primer | ACACATGAATAACGGGGTTTCC  |
| Casp 1  | Forward Primer | ACAAGGCACGGGACCTATG     |
|         | Reverse Primer | TCCCAGTCAGTCCTGGAAATG   |
| Casp 11 | Forward Primer | ACAAACACCCTGACAAACCAC   |
|         | Reverse Primer | CACTGCGTTCAGCATTGTAAA   |
| Sting   | Forward Primer | GGTCAACCGCTCCAAATATGTAG |
|         | Reverse Primer | CAGTAGTCCAAGTTCGTGCGA   |
| Cgas    | Forward Primer | GAGGCGCGGAAAGTCGTAA     |
|         | Reverse Primer | TTGTCCGGTTCCTTCTGGA     |
| IFIT1   | Forward Primer | CTGAGATGTCACTTCACATGGAA |
|         | Reverse Primer | GTGCATCCCCAATGGGTCT     |
| IFITM1  | Forward Primer | GACAGCCACCACAATCAACAT   |
|         | Reverse Primer | CCCAGGCAGCAGAAGTTCAT    |
| mtATP6  | Forward Primer | CAGTCCCCTCCCTAGGACTT    |
|         | Reverse Primer | TCAGAGCATTGGCCATAGAA    |
| Rpl13a  | Forward Primer | GGGCAGGTTCTGGTATTGGAT   |
|         | Reverse Primer | GGCTCGGAAATGGTAGGGG     |
| Stat1   | Forward Primer | TCACAGTGGTTCGAGCTTCAG   |
|         | Reverse Primer | GCAAACGAGACATCATAGGCA   |
| Irf7    | Forward Primer | GAGACTGGCTATTGGGGGAG    |
|         | Reverse Primer | GACCGAAATGCTTCCAGGG     |
| Isg15   | Forward Primer | GGTGTCCGTGACTAACTCCAT   |
|         | Reverse Primer | TGGAAAGGGTAAGACCGTCCT   |
| Podxl   | Forward Primer | GCCACCAAAGTGCCACAAC     |
|         | Reverse Primer | CGGCATAGATGGAGATTGGGT   |
| Ndufa1  | Forward Primer | ATGTGGTTCGAGATTCTCCCT   |
|         | Reverse Primer | TGGTACTGAACACGAGCAACT   |
| Cyc1    | Forward Primer | CAGCTTCCATTGCGGACAC     |
|         | Reverse Primer | GGCACTCACGGCAGAATGAA    |
| Sdhb    | Forward Primer | AATTTGCCATTTACCGATGGGA  |
|         | Reverse Primer | AGCATCCAACACCATAGGTCC   |
| Uqcrc2  | Forward Primer | AAAGTTGCCCGAAGGTTAAA    |
|         | Reverse Primer | GAGCATAGTTTTCCAGAGAAGCA |
| Uqcrb   | Forward Primer | GGCCGATCTGCTGTTTCAG     |
|         | Reverse Primer | CATCTCGCATTAAACCCAGTT   |
| Cox7b   | Forward Primer | TTGCCCTTAGCCAAAACGC     |
|         | Reverse Primer | TCATGGAAACTAGGTGCCCTC   |

---

## **Data S1. VA Million Veteran Program: Core Acknowledgement for Publications**

**Updated December 10, 2020. Related to figure 1.**

### **MVP Executive Committee**

- Co-Chair: J. Michael Gaziano, M.D., M.P.H.  
VA Boston Healthcare System, 150 S. Huntington Avenue, Boston, MA 02130
- Co-Chair: Sumitra Muralidhar, Ph.D.  
US Department of Veterans Affairs, 810 Vermont Avenue NW, Washington, DC 20420
- Rachel Ramoni, D.M.D., Sc.D., Chief VA Research and Development Officer  
US Department of Veterans Affairs, 810 Vermont Avenue NW, Washington, DC 20420
- Jean Beckham, Ph.D.  
Durham VA Medical Center, 508 Fulton Street, Durham, NC 27705
- Kyong-Mi Chang, M.D.  
Philadelphia VA Medical Center, 3900 Woodland Avenue, Philadelphia, PA 19104
- Christopher J. O'Donnell, M.D., M.P.H.  
VA Boston Healthcare System, 150 S. Huntington Avenue, Boston, MA 02130
- Philip S. Tsao, Ph.D.  
VA Palo Alto Health Care System, 3801 Miranda Avenue, Palo Alto, CA 94304
- James Breeling, M.D., Ex-Officio  
US Department of Veterans Affairs, 810 Vermont Avenue NW, Washington, DC 20420
- Grant Huang, Ph.D., Ex-Officio  
US Department of Veterans Affairs, 810 Vermont Avenue NW, Washington, DC 20420
- Juan P. Casas, M.D., Ph.D., Ex-Officio  
VA Boston Healthcare System, 150 S. Huntington Avenue, Boston, MA 02130

### **MVP Program Office**

- Sumitra Muralidhar, Ph.D.  
US Department of Veterans Affairs, 810 Vermont Avenue NW, Washington, DC 20420
- Jennifer Moser, Ph.D.  
US Department of Veterans Affairs, 810 Vermont Avenue NW, Washington, DC 20420

### **MVP Recruitment/Enrollment**

- Recruitment/Enrollment Director/Deputy Director, Boston – Stacey B. Whitbourne, Ph.D.; Jessica V. Brewer, M.P.H.  
VA Boston Healthcare System, 150 S. Huntington Avenue, Boston, MA 02130
- MVP Coordinating Centers

- Clinical Epidemiology Research Center (CERC), West Haven – Mihaela Aslan, Ph.D.  
West Haven VA Medical Center, 950 Campbell Avenue, West Haven, CT 06516
- Cooperative Studies Program Clinical Research Pharmacy Coordinating Center, Albuquerque – Todd Connor, Pharm.D.; Dean P. Argyres, B.S., M.S.  
New Mexico VA Health Care System, 1501 San Pedro Drive SE, Albuquerque, NM 87108
- Genomics Coordinating Center, Palo Alto – Philip S. Tsao, Ph.D.  
VA Palo Alto Health Care System, 3801 Miranda Avenue, Palo Alto, CA 94304
- MVP Boston Coordinating Center, Boston - J. Michael Gaziano, M.D., M.P.H.  
VA Boston Healthcare System, 150 S. Huntington Avenue, Boston, MA 02130
- MVP Information Center, Canandaigua – Brady Stephens, M.S.  
Canandaigua VA Medical Center, 400 Fort Hill Avenue, Canandaigua, NY 14424
- VA Central Biorepository, Boston – Mary T. Brophy M.D., M.P.H.; Donald E. Humphries, Ph.D.; Luis E. Selva, Ph.D.  
VA Boston Healthcare System, 150 S. Huntington Avenue, Boston, MA 02130
- MVP Informatics, Boston – Nhan Do, M.D.; Shahpoor (Alex) Shayan, M.S.  
VA Boston Healthcare System, 150 S. Huntington Avenue, Boston, MA 02130
- MVP Data Operations/Analytics, Boston – Kelly Cho, M.P.H., Ph.D.  
VA Boston Healthcare System, 150 S. Huntington Avenue, Boston, MA 02130
- Director of Regulatory Affairs – Lori Churby, B.S.  
VA Palo Alto Health Care System, 3801 Miranda Avenue, Palo Alto, CA 94304

## **MVP Science**

- Science Operations – Christopher J. O’Donnell, M.D., M.P.H.  
VA Boston Healthcare System, 150 S. Huntington Avenue, Boston, MA 02130
- Genomics Core – Christopher J. O’Donnell, M.D., M.P.H.; Saiju Pyarajan Ph.D.  
VA Boston Healthcare System, 150 S. Huntington Avenue, Boston, MA 02130  
Philip S. Tsao, Ph.D.  
VA Palo Alto Health Care System, 3801 Miranda Avenue, Palo Alto, CA 94304
- Data Core – Kelly Cho, M.P.H, Ph.D.  
VA Boston Healthcare System, 150 S. Huntington Avenue, Boston, MA 02130
- VA Informatics and Computing Infrastructure (VINCI) – Scott L. DuVall, Ph.D.  
VA Salt Lake City Health Care System, 500 Foothill Drive, Salt Lake City, UT 84148
- Data and Computational Sciences – Saiju Pyarajan, Ph.D.  
VA Boston Healthcare System, 150 S. Huntington Avenue, Boston, MA 02130
- Statistical Genetics – Elizabeth Hauser, Ph.D.  
Durham VA Medical Center, 508 Fulton Street, Durham, NC 27705  
Yan Sun, Ph.D.  
Atlanta VA Medical Center, 1670 Clairmont Road, Decatur, GA 30033

Hongyu Zhao, Ph.D.

West Haven VA Medical Center, 950 Campbell Avenue, West Haven, CT 06516

### **Current MVP Local Site Investigators**

- Atlanta VA Medical Center (Peter Wilson, M.D.)  
1670 Clairmont Road, Decatur, GA 30033
- Bay Pines VA Healthcare System (Rachel McArdle, Ph.D.)  
10,000 Bay Pines Blvd Bay Pines, FL 33744
- Birmingham VA Medical Center (Louis Dellitalia, M.D.)  
700 S. 19th Street, Birmingham AL 35233
- Central Western Massachusetts Healthcare System (Kristin Mattocks, Ph.D., M.P.H.)  
421 North Main Street, Leeds, MA 01053
- Cincinnati VA Medical Center (John Harley, M.D., Ph.D.)  
3200 Vine Street, Cincinnati, OH 45220
- Clement J. Zablocki VA Medical Center (Jeffrey Whittle, M.D., M.P.H.)  
5000 West National Avenue, Milwaukee, WI 53295
- VA Northeast Ohio Healthcare System (Frank Jacono, M.D.)  
10701 East Boulevard, Cleveland, OH 44106
- Durham VA Medical Center (Jean Beckham, Ph.D.)  
508 Fulton Street, Durham, NC 27705
- Edith Nourse Rogers Memorial Veterans Hospital (John Wells., Ph.D.)  
200 Springs Road, Bedford, MA 01730
- Edward Hines, Jr. VA Medical Center (Salvador Gutierrez, M.D.)  
5000 South 5th Avenue, Hines, IL 60141
- Veterans Health Care System of the Ozarks (Gretchen Gibson, D.D.S., M.P.H.)  
1100 North College Avenue, Fayetteville, AR 72703
- Fargo VA Health Care System (Kimberly Hammer, Ph.D.)  
2101 N. Elm, Fargo, ND 58102
- VA Health Care Upstate New York (Laurence Kaminsky, Ph.D.)  
113 Holland Avenue, Albany, NY 12208
- New Mexico VA Health Care System (Gerardo Villareal, M.D.)  
1501 San Pedro Drive, S.E. Albuquerque, NM 87108
- VA Boston Healthcare System (Scott Kinlay, M.B.B.S., Ph.D.)  
150 S. Huntington Avenue, Boston, MA 02130
- VA Western New York Healthcare System (Junzhe Xu, M.D.)  
3495 Bailey Avenue, Buffalo, NY 14215-1199
- Ralph H. Johnson VA Medical Center (Mark Hamner, M.D.)  
109 Bee Street, Mental Health Research, Charleston, SC 29401
- Columbia VA Health Care System (Roy Mathew, M.D.)  
6439 Garners Ferry Road, Columbia, SC 29209

- VA North Texas Health Care System (Sujata Bhushan, M.D.)  
4500 S. Lancaster Road, Dallas, TX 75216
- Hampton VA Medical Center (Pran Iruvanti, D.O., Ph.D.)  
100 Emancipation Drive, Hampton, VA 23667
- Richmond VA Medical Center (Michael Godschalk, M.D.)  
1201 Broad Rock Blvd., Richmond, VA 23249
- Iowa City VA Health Care System (Zuhair Ballas, M.D.)  
601 Highway 6 West, Iowa City, IA 52246-2208
- Eastern Oklahoma VA Health Care System (Douglas Ivins, M.D.)  
1011 Honor Heights Drive, Muskogee, OK 74401
- James A. Haley Veterans' Hospital (Stephen Mastorides, M.D.)  
13000 Bruce B. Downs Blvd, Tampa, FL 33612
- James H. Quillen VA Medical Center (Jonathan Moorman, M.D., Ph.D.)  
Corner of Lamont & Veterans Way, Mountain Home, TN 37684
- John D. Dingell VA Medical Center (Saib Gappy, M.D.)  
4646 John R Street, Detroit, MI 48201
- Louisville VA Medical Center (Jon Klein, M.D., Ph.D.)  
800 Zorn Avenue, Louisville, KY 40206
- Manchester VA Medical Center (Nora Ratcliffe, M.D.)  
718 Smyth Road, Manchester, NH 03104
- Miami VA Health Care System (Hermes Florez, M.D., Ph.D.)  
1201 NW 16th Street, 11 GRC, Miami FL 33125
- Michael E. DeBakey VA Medical Center (Olaoluwa Okusaga, M.D.)  
2002 Holcombe Blvd, Houston, TX 77030
- Minneapolis VA Health Care System (Maureen Murdoch, M.D., M.P.H.)  
One Veterans Drive, Minneapolis, MN 55417
- N. FL/S. GA Veterans Health System (Peruvemba Sriram, M.D.)  
1601 SW Archer Road, Gainesville, FL 32608
- Northport VA Medical Center (Shing Shing Yeh, Ph.D., M.D.)  
79 Middleville Road, Northport, NY 11768
- Overton Brooks VA Medical Center (Neeraj Tandon, M.D.)  
510 East Stoner Ave, Shreveport, LA 71101
- Philadelphia VA Medical Center (Darshana Jhala, M.D.)  
3900 Woodland Avenue, Philadelphia, PA 19104
- Phoenix VA Health Care System (Samuel Aguayo, M.D.)  
650 E. Indian School Road, Phoenix, AZ 85012
- Portland VA Medical Center (David Cohen, M.D.)  
3710 SW U.S. Veterans Hospital Road, Portland, OR 97239
- Providence VA Medical Center (Satish Sharma, M.D.)  
830 Chalkstone Avenue, Providence, RI 02908

- Richard Roudebush VA Medical Center (Suthat Liangpunsakul, M.D., M.P.H.)  
1481 West 10th Street, Indianapolis, IN 46202
- Salem VA Medical Center (Kris Ann Oursler, M.D.)  
1970 Roanoke Blvd, Salem, VA 24153
- San Francisco VA Health Care System (Mary Whooley, M.D.)  
4150 Clement Street, San Francisco, CA 94121
- South Texas Veterans Health Care System (Sunil Ahuja, M.D.)  
7400 Merton Minter Boulevard, San Antonio, TX 78229
- Southeast Louisiana Veterans Health Care System (Joseph Constans, Ph.D.)  
2400 Canal Street, New Orleans, LA 70119
- Southern Arizona VA Health Care System (Paul Meyer, M.D., Ph.D.)  
3601 S 6th Avenue, Tucson, AZ 85723
- Sioux Falls VA Health Care System (Jennifer Greco, M.D.)  
2501 W 22nd Street, Sioux Falls, SD 57105
- St. Louis VA Health Care System (Michael Rauchman, M.D.)  
915 North Grand Blvd, St. Louis, MO 63106
- Syracuse VA Medical Center (Richard Servatius, Ph.D.)  
800 Irving Avenue, Syracuse, NY 13210
- VA Eastern Kansas Health Care System (Melinda Gaddy, Ph.D.)  
4101 S 4th Street Trafficway, Leavenworth, KS 66048
- VA Greater Los Angeles Health Care System (Agnes Wallbom, M.D., M.S.)  
11301 Wilshire Blvd, Los Angeles, CA 90073
- VA Long Beach Healthcare System (Timothy Morgan, M.D.)  
5901 East 7th Street Long Beach, CA 90822
- VA Maine Healthcare System (Todd Stapley, D.O.)  
1 VA Center, Augusta, ME 04330
- VA New York Harbor Healthcare System (Scott Sherman, M.D., M.P.H.)  
423 East 23rd Street, New York, NY 10010
- VA Pacific Islands Health Care System (George Ross, M.D.)  
459 Patterson Rd, Honolulu, HI 96819
- VA Palo Alto Health Care System (Philip Tsao, Ph.D.)  
3801 Miranda Avenue, Palo Alto, CA 94304-1290
- VA Pittsburgh Health Care System (Patrick Strollo, Jr., M.D.)  
University Drive, Pittsburgh, PA 15240
- VA Puget Sound Health Care System (Edward Boyko, M.D.)  
1660 S. Columbian Way, Seattle, WA 98108-1597
- VA Salt Lake City Health Care System (Laurence Meyer, M.D., Ph.D.)  
500 Foothill Drive, Salt Lake City, UT 84148
- VA San Diego Healthcare System (Samir Gupta, M.D., M.S.C.S.)  
3350 La Jolla Village Drive, San Diego, CA 92161

- VA Sierra Nevada Health Care System (Mostaqul Huq, Pharm.D., Ph.D.)  
975 Kirman Avenue, Reno, NV 89502
- VA Southern Nevada Healthcare System (Joseph Fayad, M.D.)  
6900 North Pecos Road, North Las Vegas, NV 89086
- VA Tennessee Valley Healthcare System (Adriana Hung, M.D., M.P.H.)  
1310 24th Avenue, South Nashville, TN 37212
- Washington DC VA Medical Center (Jack Lichy, M.D., Ph.D.)  
50 Irving St, Washington, D. C. 20422
- W.G. (Bill) Hefner VA Medical Center (Robin Hurley, M.D.)  
1601 Brenner Ave, Salisbury, NC 28144
- White River Junction VA Medical Center (Brooks Robey, M.D.)  
163 Veterans Drive, White River Junction, VT 05009
- William S. Middleton Memorial Veterans Hospital (Robert Striker, M.D., Ph.D.)  
2500 Overlook Terrace, Madison, WI 53705
